# Supplementary material for: Ruthenium(ii) complex containing cinnamic acid derivative inhibits cell cycle progression at G0/G1 and induces apoptosis in melanoma cells
Source: Royal Society of Chemistry journal article supplement (doi:10.1039/d1nj04291b), 2022-01-01
Supplement: d1nj04291b1.pdf [file d1nj04291b1.pdf]

**Ruthenium(II) complex containing cinamic acid derivative  
inhibits cell cycle progression at G0/G1 and induces apoptosis  
in melanoma cells**

Amanda Alvim Negreti<sup>a</sup>, Guilherme Álvaro Ferreira-Silva<sup>a</sup>, Carolina Girotto Pressete<sup>a</sup>, Rafael Fonseca Miranda<sup>a</sup>, Caio C. Candido<sup>b</sup>, Angelica E. Graminha<sup>c</sup>, Antonio Carlos Doriguetto<sup>b</sup>, Ester Siqueira Caixeta<sup>a</sup>, João Adolfo Costa Hanemann<sup>d</sup>, Angel Maurício Castro Gamero<sup>e</sup>, Marilia I. F. Barbosa<sup>\*b</sup>, Marta Miyazawa<sup>\*d</sup>, Marisa Ionta<sup>\*a</sup>

<sup>a</sup>Institute of Biomedical Sciences, Federal University of Alfenas, zip-code 37130-001, Alfenas, MG, Brazil

<sup>b</sup>Institute of Chemistry, Federal University of Alfenas, zip-code 37130-001, Alfenas, MG, Brazil

<sup>c</sup>Department of Chemistry, Federal University of São Carlos, zip code 13565-905, São Carlos, SP, Brazil

<sup>d</sup>Department of Clinic and Surgery, School of Dentistry. Federal University of Alfenas, zip-code 37130-001, Alfenas, MG, Brazil

<sup>e</sup>Human Genetics Laboratory, Institute of Natural Science, Federal University of Alfenas, Alfenas, MG, Brazil

\*Corresponding author: Marisa Ionta, Marta Miyazawa and Marilia I.F. Barbosa

E-mail addresses: [marisa.ionta@unifal-mg.edu.br](mailto:marisa.ionta@unifal-mg.edu.br); [marta.miyazawa@unifal-mg.edu.br](mailto:marta.miyazawa@unifal-mg.edu.br); [mariliaifrazaob@yahoo.com.br](mailto:mariliaifrazaob@yahoo.com.br)

## SUMMARY

**Figure S1.**  $^{31}\text{P}\{^1\text{H}\}$  spectrum of  $[\text{Ru}(\text{L}_1)(\text{dppb})(\text{bipy})]\text{PF}_6$

**Figure S2.**  $^{31}\text{P}\{^1\text{H}\}$  spectrum of  $[\text{Ru}(\text{L}_2)(\text{dppb})(\text{bipy})]\text{PF}_6$

**Figure S3.**  $^{31}\text{P}\{^1\text{H}\}$  spectrum of  $[\text{Ru}(\text{L}_3)(\text{dppb})(\text{bipy})]\text{PF}_6$

**Figure S4.**  $^1\text{H}$  spectrum of  $[\text{Ru}(\text{L}_1)(\text{dppb})(\text{bipy})]\text{PF}_6$

**Figure S5.**  $^1\text{H}$  spectrum of  $[\text{Ru}(\text{L}_2)(\text{dppb})(\text{bipy})]\text{PF}_6$

**Figure S6.**  $^1\text{H}$  spectrum of  $[\text{Ru}(\text{L}_3)(\text{dppb})(\text{bipy})]\text{PF}_6$

**Figure S7.**  $^{13}\text{C}\{^1\text{H}\}$  spectrum of  $[\text{Ru}(\text{L}_1)(\text{dppb})(\text{bipy})]\text{PF}_6$

**Figure S8.**  $^{13}\text{C}\{^1\text{H}\}$  spectrum of  $[\text{Ru}(\text{L}_2)(\text{dppb})(\text{bipy})]\text{PF}_6$

**Figure S9.**  $^{13}\text{C}\{^1\text{H}\}$  spectrum of  $[\text{Ru}(\text{L}_3)(\text{dppb})(\text{bipy})]\text{PF}_6$

**Figure S10:**  $^{31}\text{P}\{^1\text{H}\}$  NMR spectroscopy of  $[\text{Ru}(\text{L}_1)(\text{dppb})(\text{bipy})]\text{PF}_6$  : 0 min., 24 h and 48 h, in DMSO-d6

**Figure S11:**  $^{31}\text{P}\{^1\text{H}\}$  NMR spectroscopy of  $[\text{Ru}(\text{L}_2)(\text{dppb})(\text{bipy})]\text{PF}_6$  : 0 min., 24 h and 48 h, in DMSO-d6

**Figure S12:**  $^{31}\text{P}\{^1\text{H}\}$  NMR spectroscopy of  $[\text{Ru}(\text{L}_3)(\text{dppb})(\text{bipy})]\text{PF}_6$  : 0 min., 24 h and 48 h, in DMSO-d6

**Figure S13.** IR spectrum of (A)  $\text{L}_1$  and (B)  $[\text{Ru}(\text{L}_1)(\text{dppb})(\text{bipy})]\text{PF}_6$  in KBr.

**Figure S14.** IR spectrum of (A)  $L_2$  and (B)  $[\text{Ru}(L_2)(\text{dppb})(\text{bipy})]\text{PF}_6$  in KBr.

**Figure S15.** IR spectrum of (A)  $L_3$  and (B)  $[\text{Ru}(L_3)(\text{dppb})(\text{bipy})]\text{PF}_6$  in KBr.

**Figure S16.** UV-Vis spectrum of  $[\text{Ru}(L_1)(\text{dppb})(\text{bipy})]\text{PF}_6$  in  $\text{CH}_2\text{Cl}_2$ .

**Figure S17.** UV-Vis spectrum of  $[\text{Ru}(L_2)(\text{dppb})(\text{bipy})]\text{PF}_6$  in  $\text{CH}_2\text{Cl}_2$ .

**Figure S18.** UV-Vis spectrum of  $[\text{Ru}(L_3)(\text{dppb})(\text{bipy})]\text{PF}_6$  in  $\text{CH}_2\text{Cl}_2$ .

**Figure S19.** cyclic voltammogram of (A)  $[\text{Ru}(L_1)(\text{dppb})(\text{bipy})]\text{PF}_6$ , (B)  $[\text{Ru}(L_2)(\text{dppb})(\text{bipy})]\text{PF}_6$ , (C)  $[\text{Ru}(L_3)(\text{dppb})(\text{bipy})]\text{PF}_6$ .

**Figure S20.** Cell viability determined by MTS assay in HT-144 cell line after 24 h of the treatment with ligands  $L_1$ ,  $L_2$  or  $L_3$ .

**Figure S21.** Cell viability determined by Trypan blue exclusion assay in CHL-1 cell line after 24 h of the treatment with  $[\text{Ru}(L_2)(\text{dppb})(\text{bipy})]\text{PF}_6$  (complex **2**).

**Table 1S.** chemical shifts and coupling constants of the complexes

**Table 2S.** IR frequencies

**Table 3S.** Electrochemical potentials of the complexes

**Table 4S.** Selectivity indexes using CCD-1059Sk as reference of non-tumor cells.

**Table 5S.** Selectivity indexes using FB1 as reference of non-tumor cells.

**Table 6S.** Selectivity indexes using NGM as reference of non-tumor cells.

20210313 mmic 10  
mmic 10 com dms  
p  
CDCL3

~53.50  
~53.22  
~50.79  
~50.51

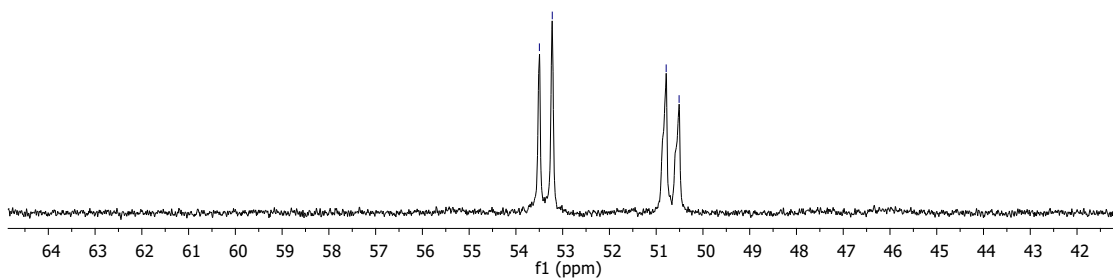

**Figure S1:**  $^{31}\text{P}\{^1\text{H}\}$  spectrum of  $[\text{Ru}(\text{L}_1)(\text{dppb})(\text{bipy})]\text{PF}_6$ , in  $\text{CH}_2\text{Cl}_2$ .

20210113 cbaccf3  
cbaccf3 lavado 2 a missão  
p  
d2o

~51.49  
~51.21  
~49.05  
~48.77

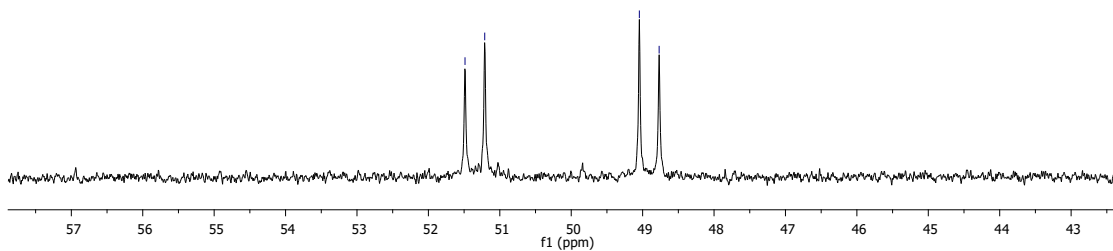

**Figure S2:**  $^{31}\text{P}\{^1\text{H}\}$  spectrum of  $[\text{Ru}(\text{L}_2)(\text{dppb})(\text{bipy})]\text{PF}_6$ , in  $\text{CH}_2\text{Cl}_2$ .

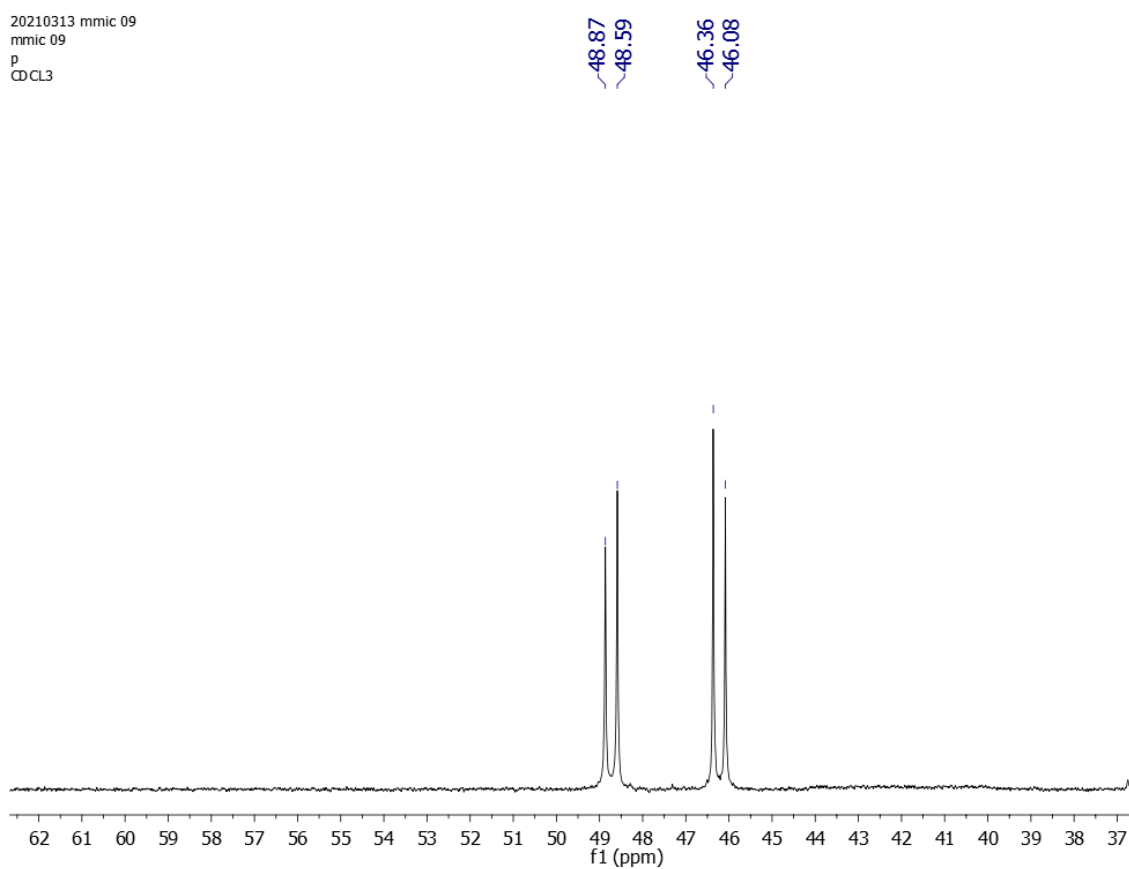

**Figure S3:**  $^{31}\text{P}\{^1\text{H}\}$  spectrum of  $[\text{Ru}(\text{L}_3)(\text{dppb})(\text{bipy})]\text{PF}_6$ , in  $\text{CH}_2\text{Cl}_2$ .

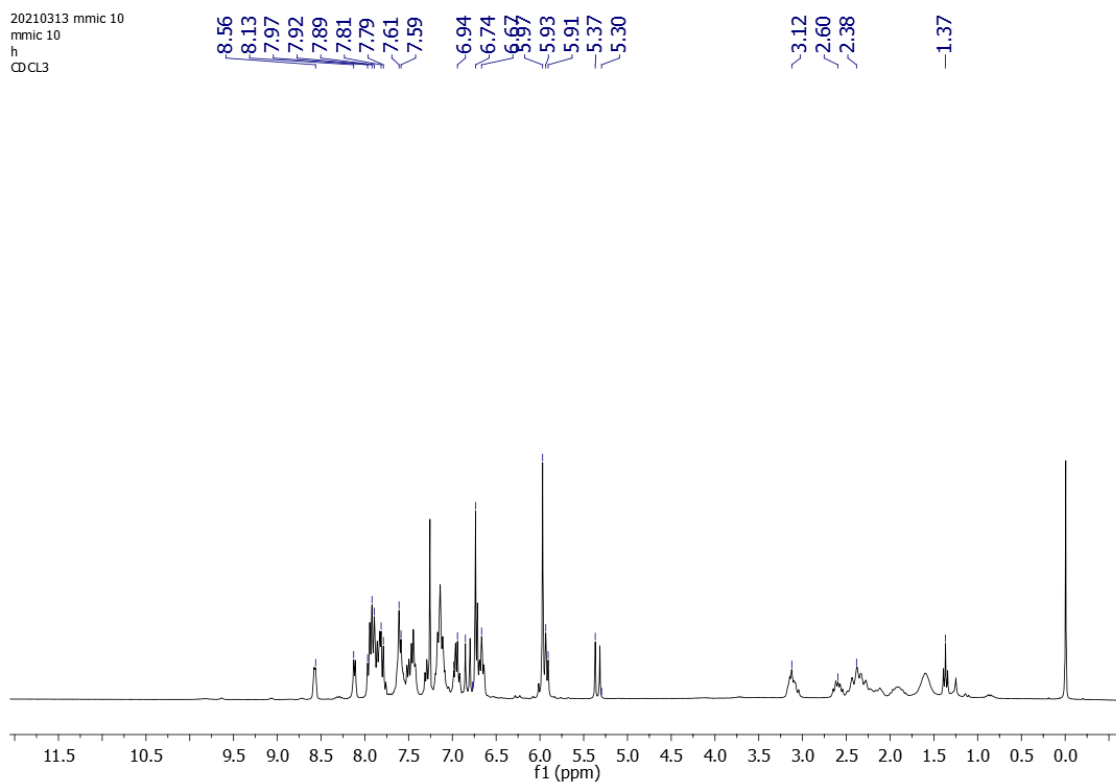

**Figure S4:**  $^1\text{H}$  spectrum of  $[\text{Ru}(\text{L}_1)(\text{dppb})(\text{bipy})]\text{PF}_6$ , in  $\text{CDCl}_3$ .

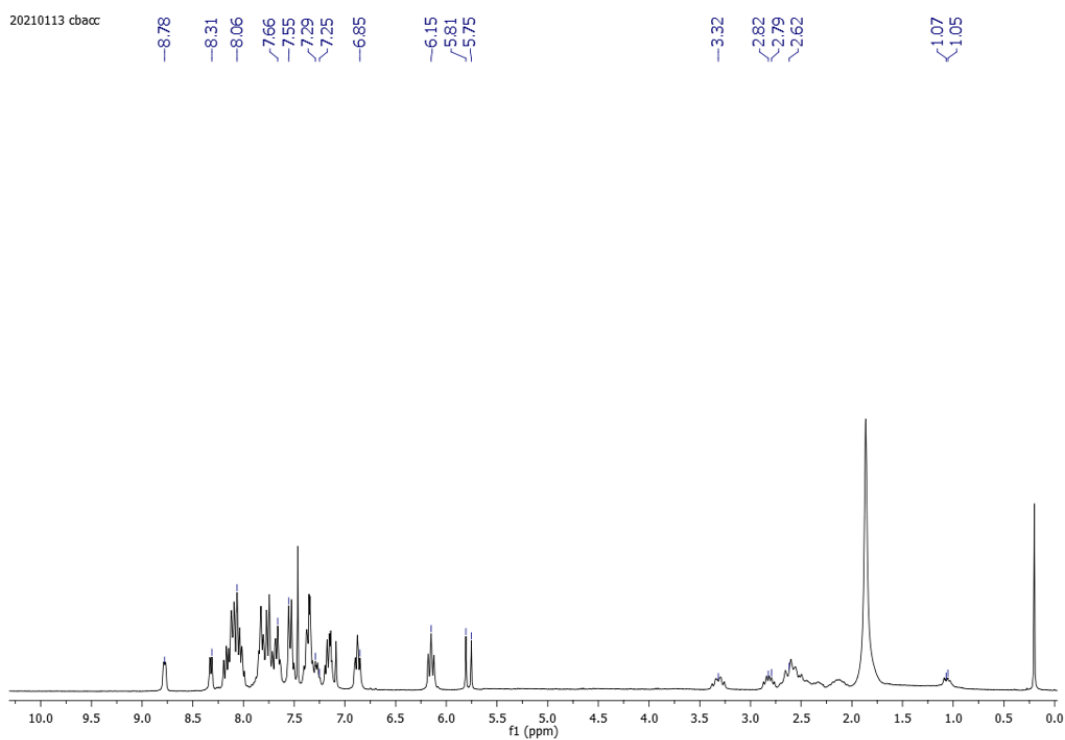

**Figure S5:**  $^1\text{H}$  spectrum of  $[\text{Ru}(\text{L}_2)(\text{dppb})(\text{bipy})]\text{PF}_6$ , in  $\text{CDCl}_3$ .

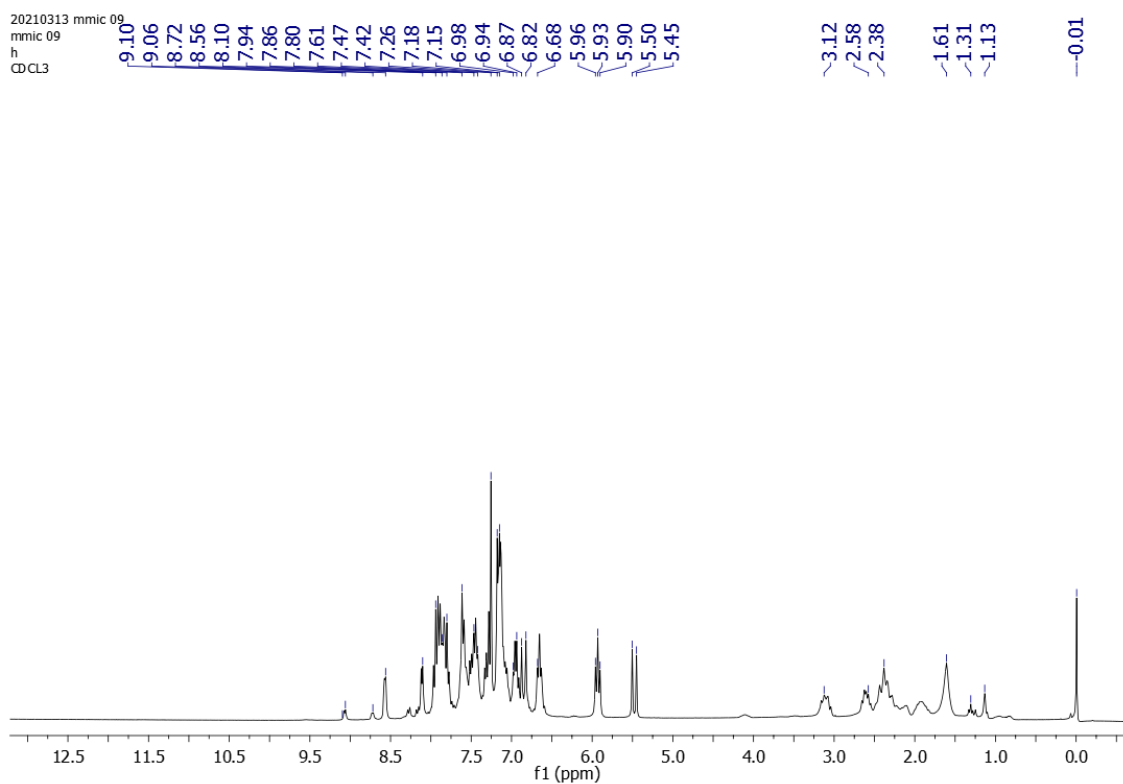

**Figure S6:**  $^1\text{H}$  spectrum of  $[\text{Ru}(\text{L}_3)(\text{dppb})(\text{bipy})]\text{PF}_6$ , in  $\text{CDCl}_3$ .

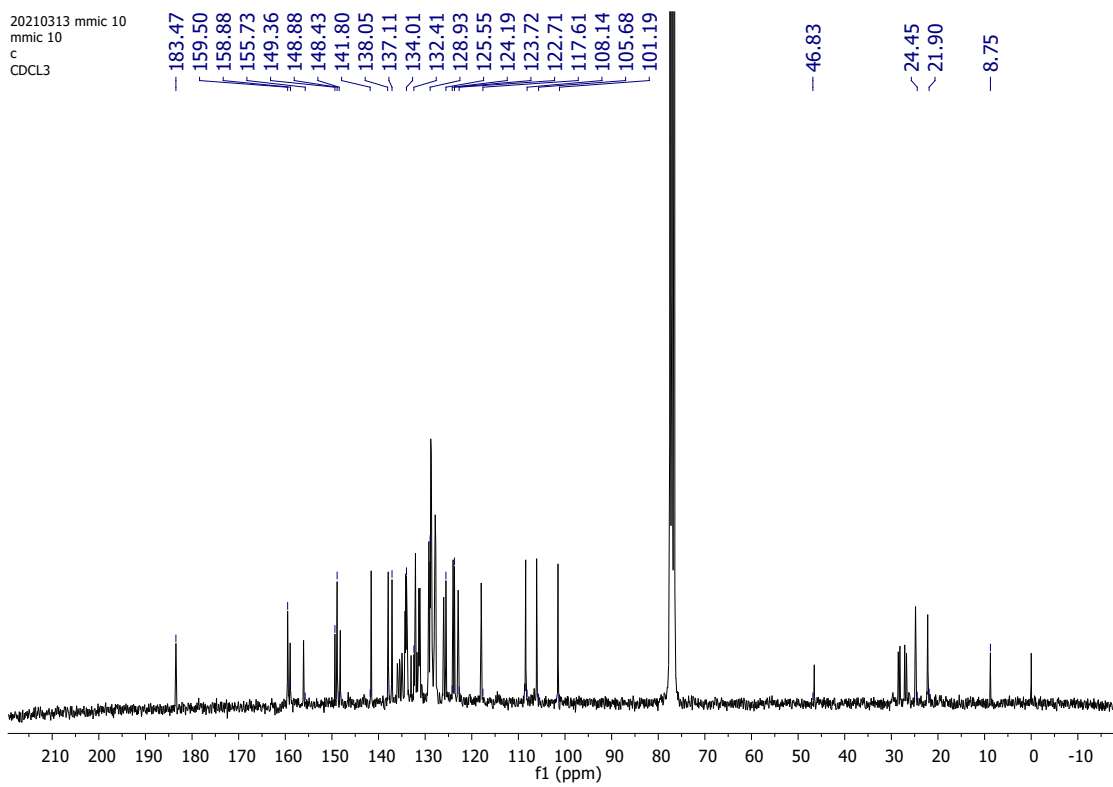

**Figure S7:**  $^{13}\text{C}\{^1\text{H}\}$  spectrum of  $[\text{Ru}(\text{L}_1)(\text{dppb})(\text{bipy})]\text{PF}_6$ , in  $\text{CDCl}_3$ .

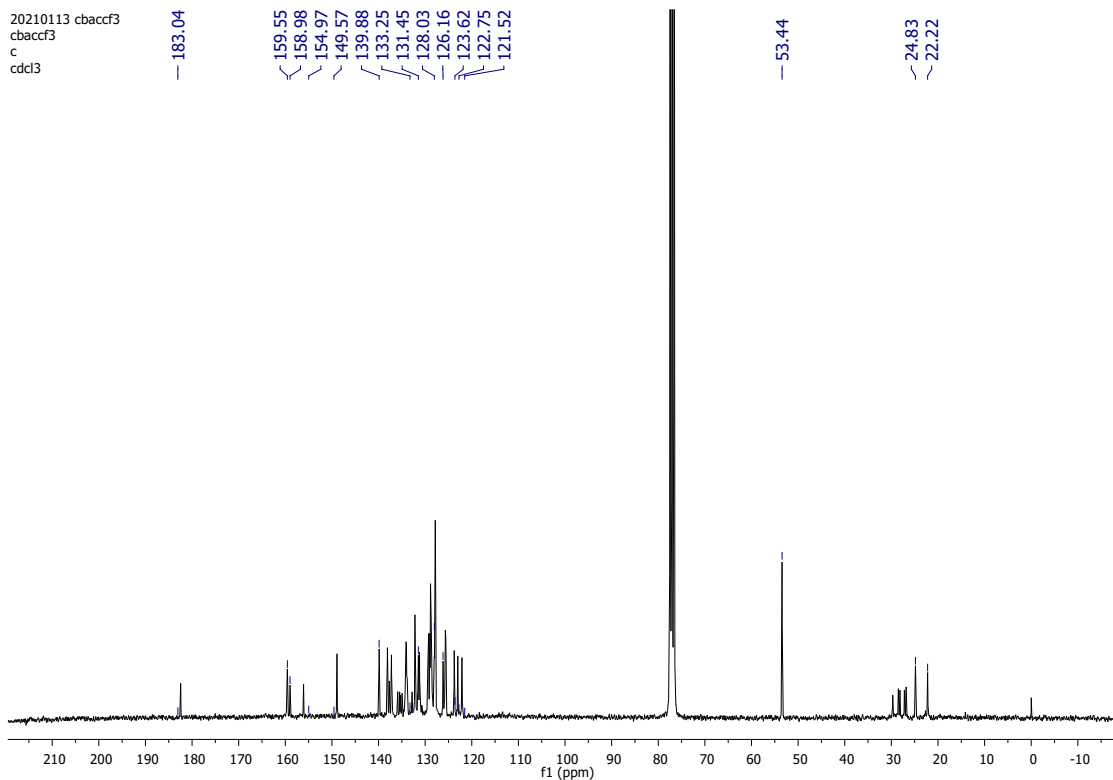

**Figure S8:**  $^{13}\text{C}\{^1\text{H}\}$  spectrum of  $[\text{Ru}(\text{L}_2)(\text{dppb})(\text{bipy})]\text{PF}_6$ , in  $\text{CDCl}_3$ .

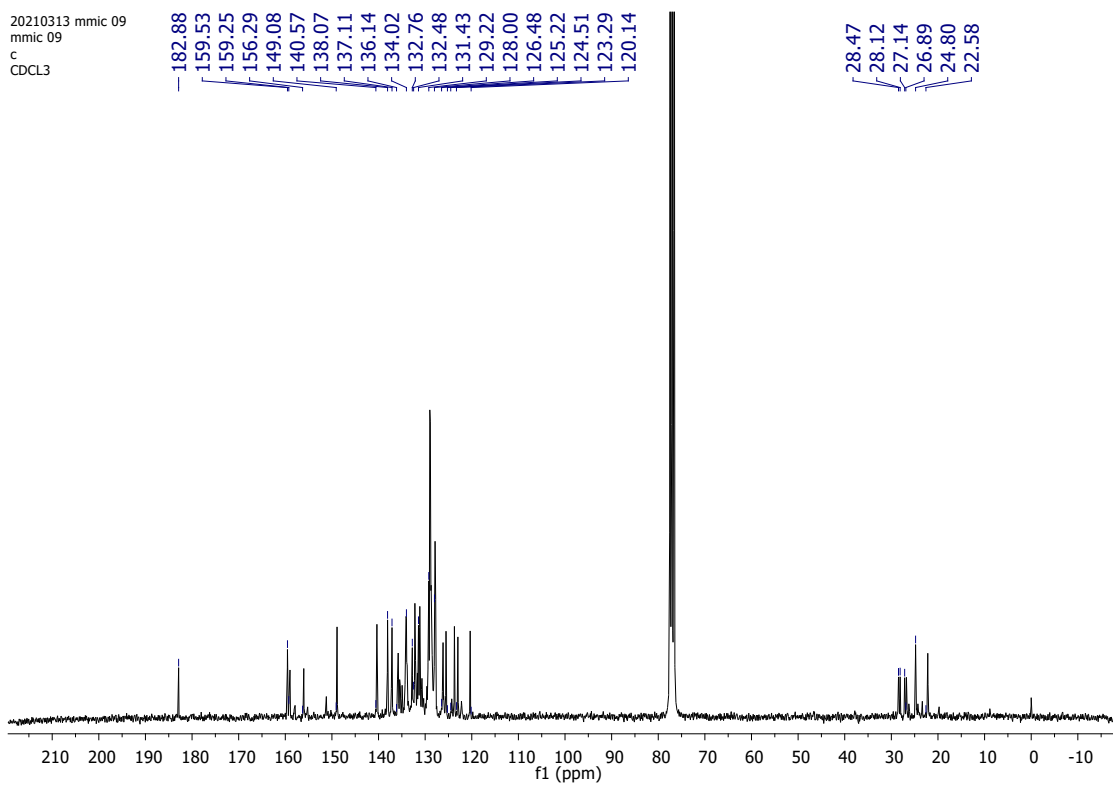



**Figure S9:**  $^{13}\text{C}\{^1\text{H}\}$  spectrum of  $[\text{Ru}(\text{L}_3)(\text{dppb})(\text{bipy})]\text{PF}_6$ , in  $\text{CDCl}_3$ .

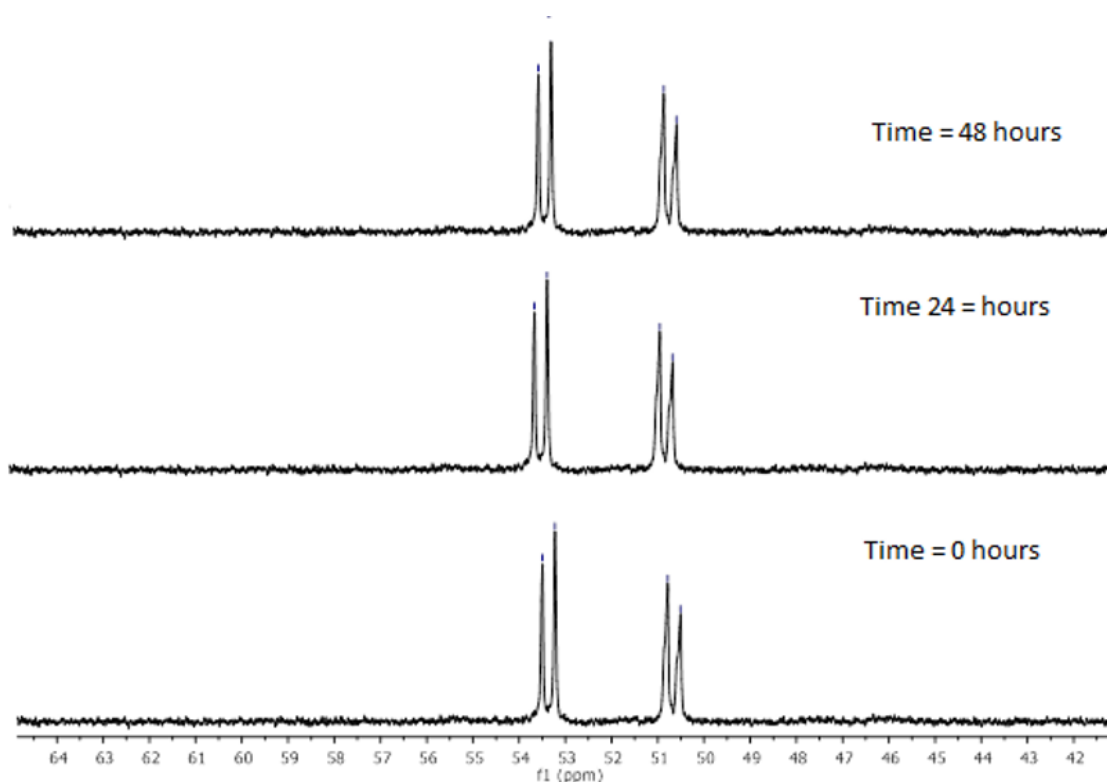

**Figure S10:**  $^{31}\text{P}\{^1\text{H}\}$  NMR spectroscopy of  $[\text{Ru}(\text{L}_1)(\text{dppb})(\text{bipy})]\text{PF}_6$ : 0 min., 24 h and 48 h, in  $\text{DMSO-d}_6$

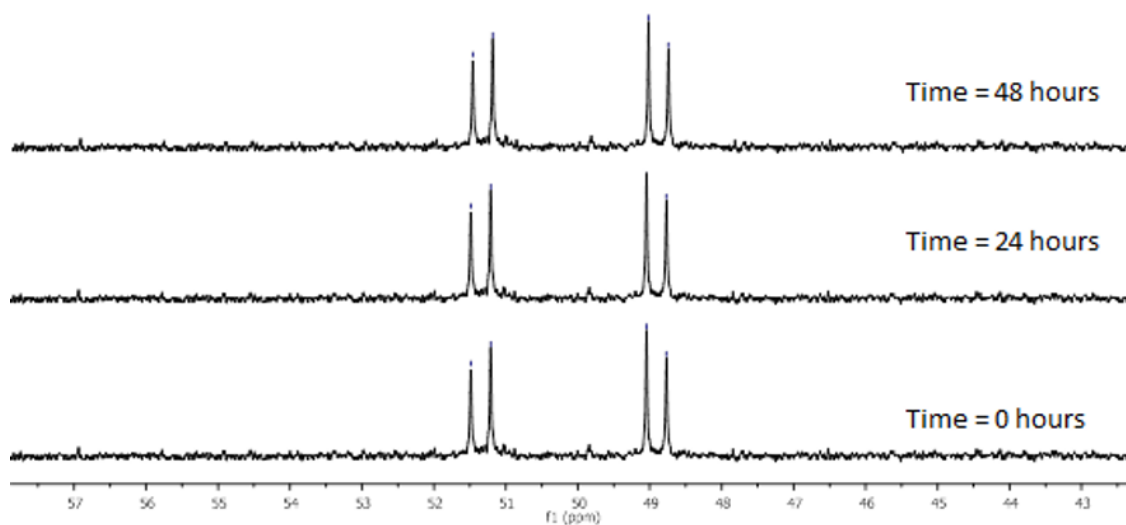

**Figure S11:**  $^{31}\text{P}\{^1\text{H}\}$  NMR spectroscopy of  $[\text{Ru}(\text{L}_2)(\text{dppb})(\text{bipy})]\text{PF}_6$ : 0 min., 24 h and 48 h, in  $\text{DMSO-d}_6$

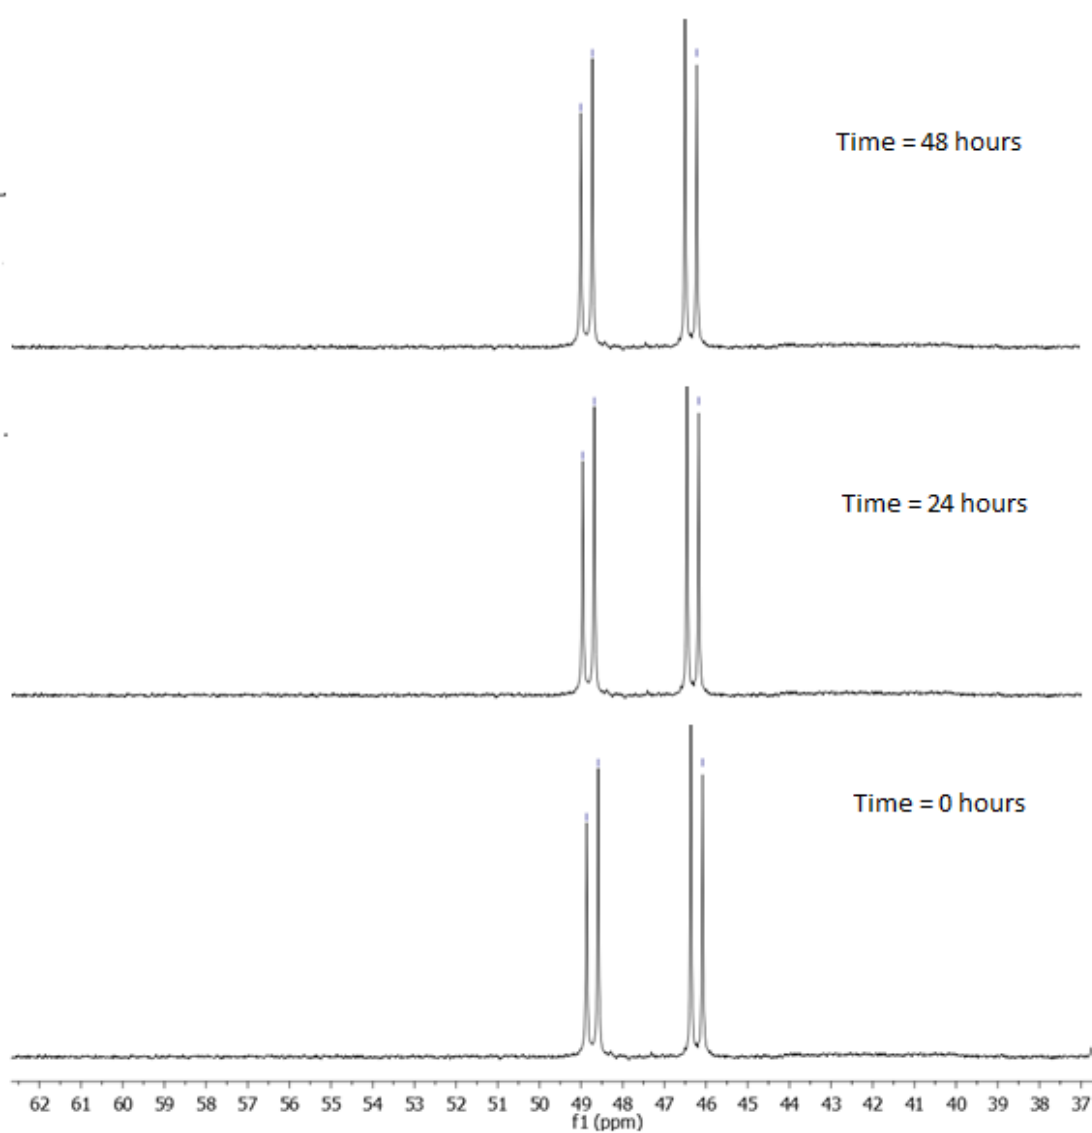

**Figure S12:**  $^{31}\text{P}\{^1\text{H}\}$  NMR spectroscopy of  $[\text{Ru}(\text{L}_3)(\text{dppb})(\text{bipy})]\text{PF}_6$  : 0 min., 24 h and 48 h, in  $\text{DMSO-d}_6$

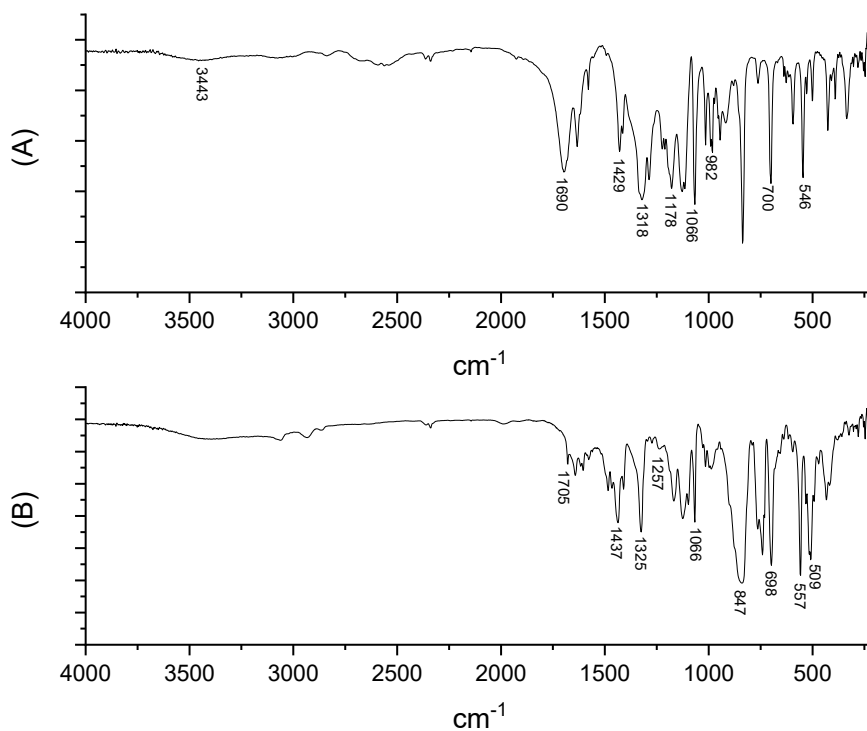

**Figure S13:** IR spectrum of (A) L1 ligand and (B)  $[\text{Ru}(\text{L1})(\text{dppb})(\text{bipy})]\text{PF}_6$  in KBr.

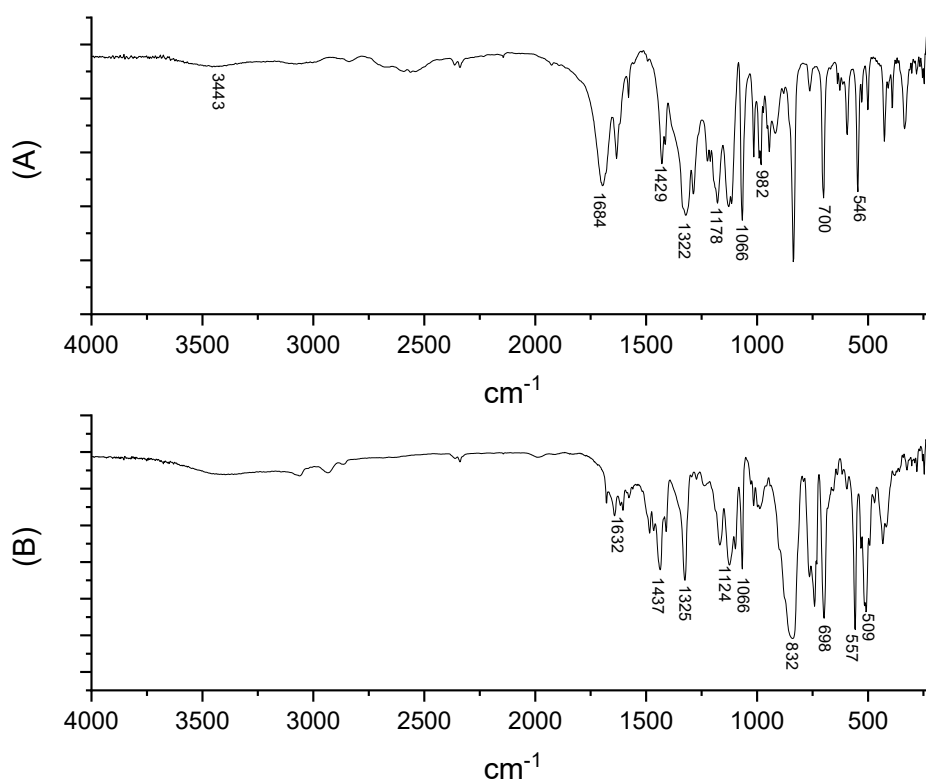

**Figure S14:** IR spectrum of (A) L2 ligand and (B)  $[\text{Ru}(\text{L2})(\text{dppb})(\text{bipy})]\text{PF}_6$  in KBr.

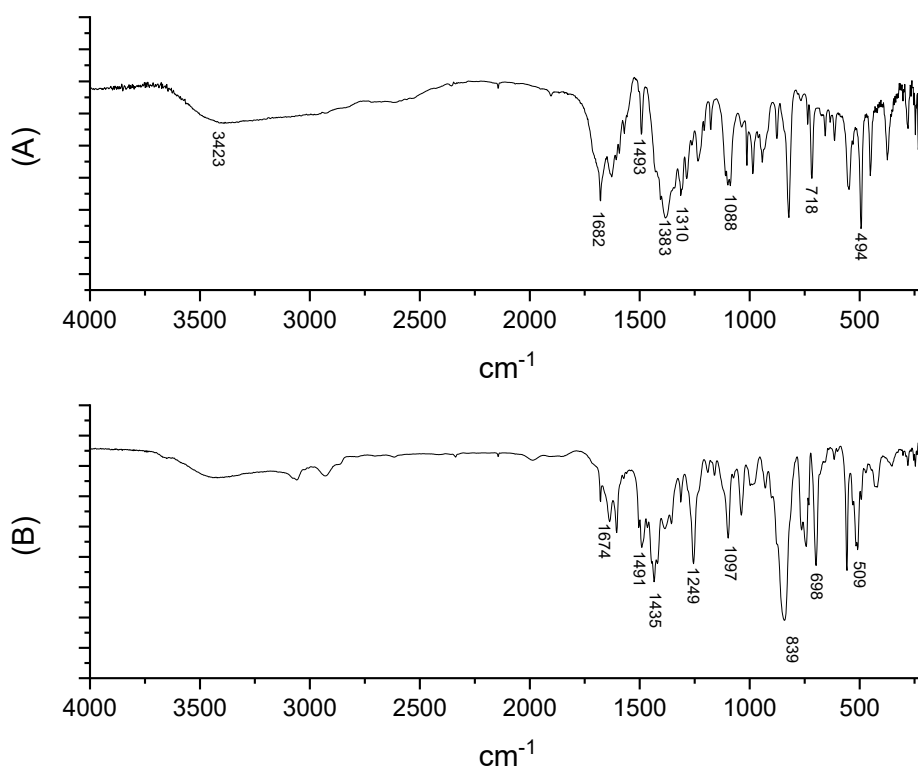

**Figure S15:** IR spectrum of (A) L3 ligand and (B)  $[\text{Ru}(\text{L3})(\text{dppb})(\text{bipy})]\text{PF}_6$  in KBr.

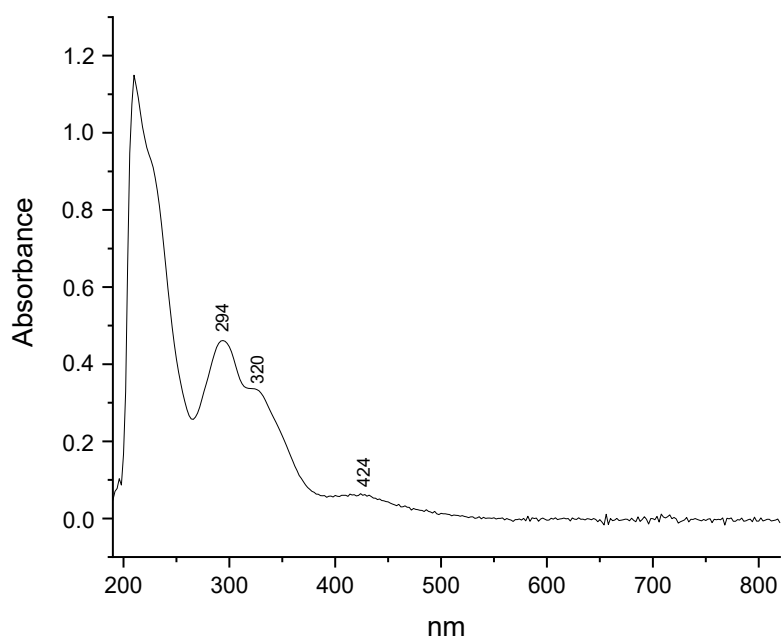

**Figure S16:** UV-Vis spectrum of  $[\text{Ru}(\text{L1})(\text{dppb})(\text{bipy})]\text{PF}_6$  in  $\text{CH}_2\text{Cl}_2$ .

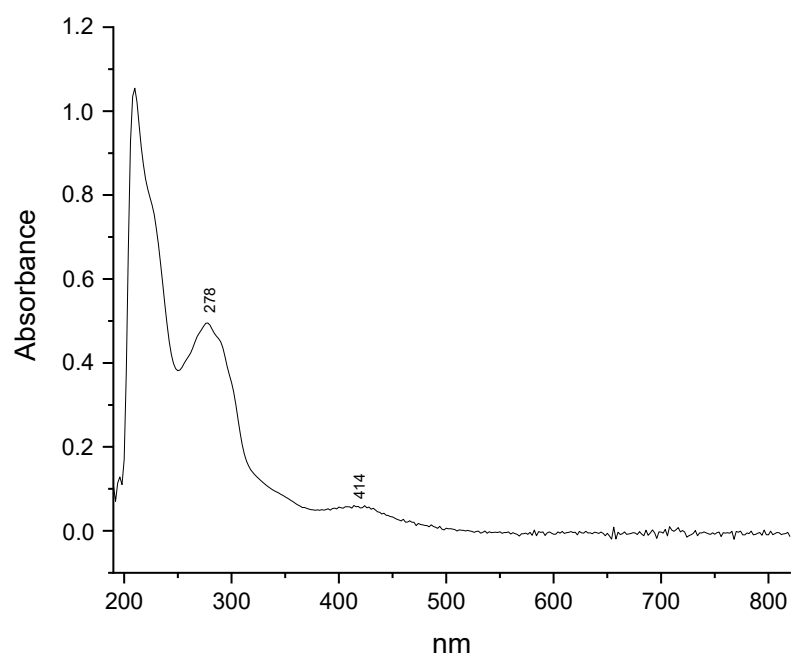

**Figure S17:** UV-Vis spectrum of  $[\text{Ru}(\text{L2})(\text{dppb})(\text{bipy})]\text{PF}_6$  in  $\text{CH}_2\text{Cl}_2$ .

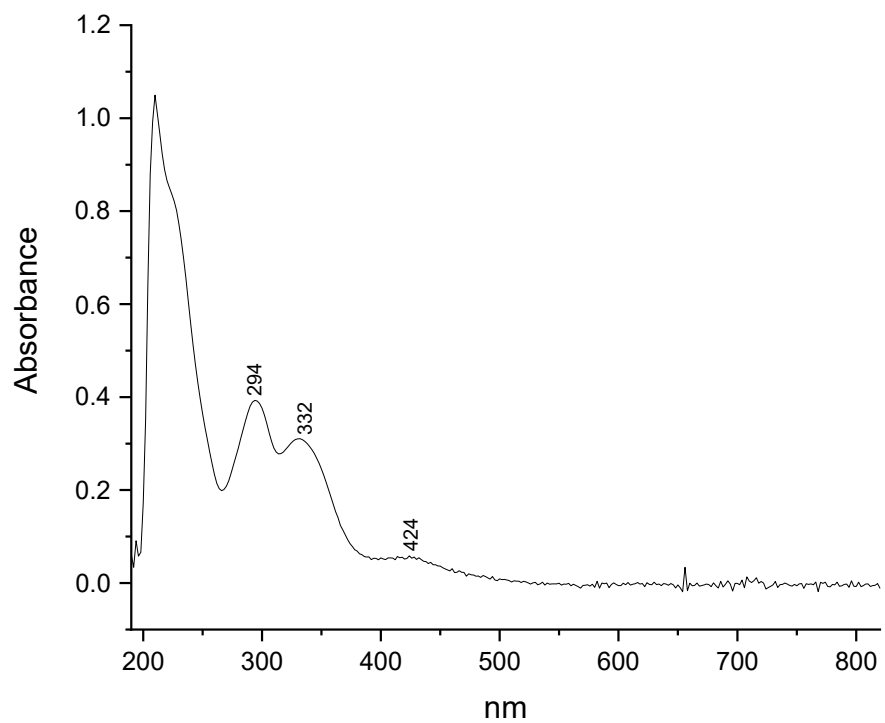

**Figure S18:** UV-Vis spectrum of  $[\text{Ru}(\text{L3})(\text{dppb})(\text{bipy})]\text{PF}_6$  in  $\text{CH}_2\text{Cl}_2$ .

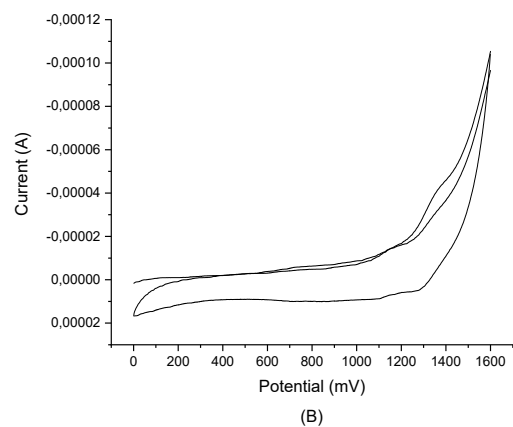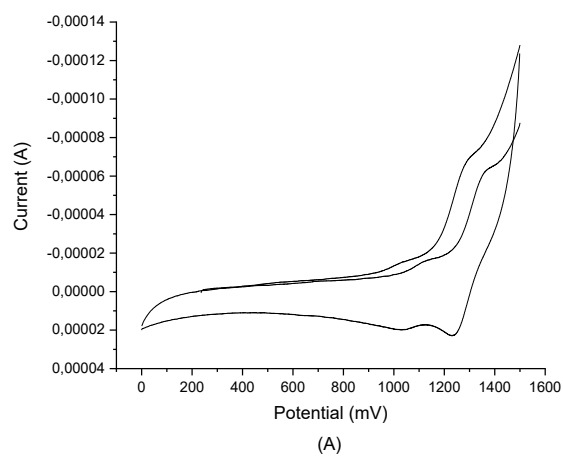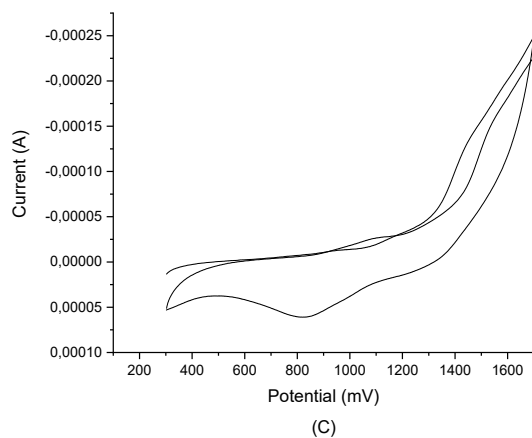

**Figure S19:** cyclic voltammogram of (A)  $[\text{Ru}(\text{L1})(\text{dppb})(\text{bipy})]\text{PF}_6$ , (B)  $[\text{Ru}(\text{L2})(\text{dppb})(\text{bipy})]\text{PF}_6$ , (C)  $[\text{Ru}(\text{L3})(\text{dppb})(\text{bipy})]\text{PF}_6$

## HT-144

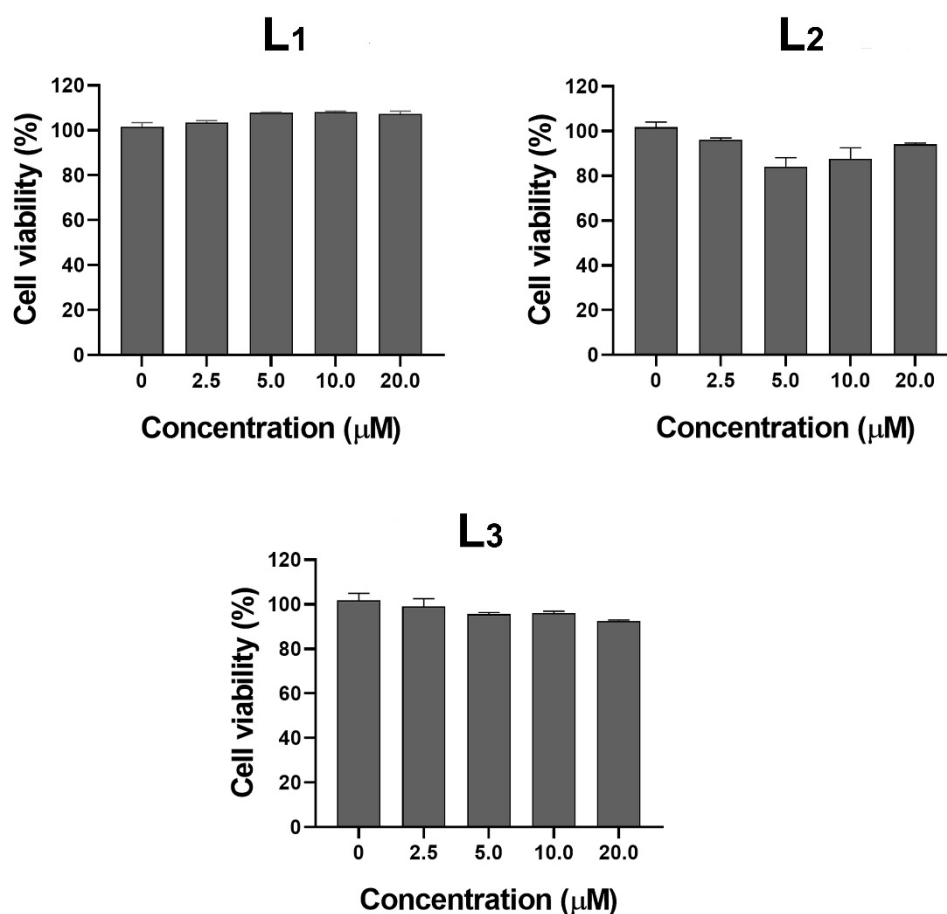

**Figure S20.** Cell viability determined by MTS assay in HT-144 cell line after 24 h of the treatment with ligands L<sub>1</sub>, L<sub>2</sub> or L<sub>3</sub>.

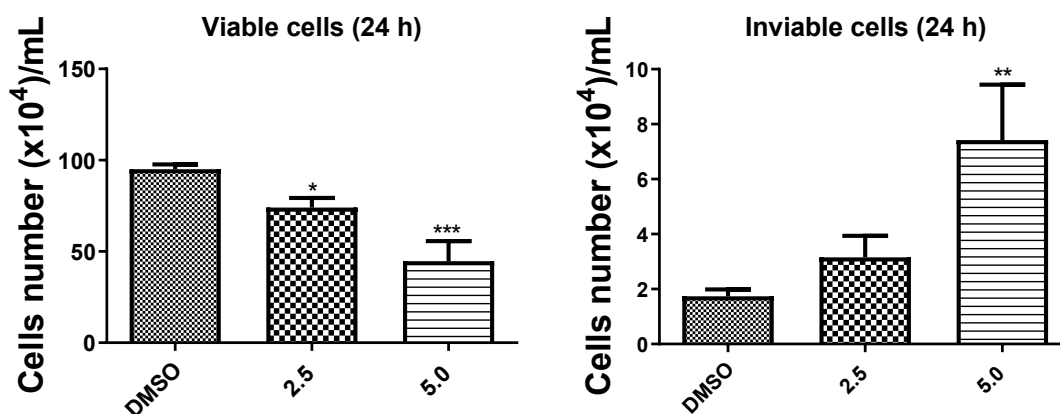

**Figure S21.** Cell viability determined by Trypan blue exclusion assay in CHL-1 cell line after 24 h of the treatment with complex (2). \* $p < 0.05$ , \*\* $p < 0.01$ , \*\*\* $p < 0.001$  compared to control group (DMSO).

**Table 1S.** chemical shifts and coupling constants of the complexes

| Compound                                         | $\delta$ $^{31}\text{P}\{\text{H}\}$ (ppm) | $^2\text{J}_{\text{p-p}}$ (Hz) |
|--------------------------------------------------|--------------------------------------------|--------------------------------|
| [RuCl <sub>2</sub> (dppb)(bipy)]                 | 41.5 / 32.8                                | 30.0                           |
| [Ru(L <sub>1</sub> )(dppb)(bipy)]PF <sub>6</sub> | 53.4 / 50.6                                | 38.2                           |
| [Ru(L <sub>2</sub> )(dppb)(bipy)]PF <sub>6</sub> | 45.5 / 46.0                                | 36.8                           |
| [Ru(L <sub>3</sub> )(dppb)(bipy)]PF <sub>6</sub> | 48.7 / 46.2                                | 38.2                           |

**Table 2S.** IR carboxylate and counter ion stretching frequencies

| Compound                                         | vas(COO <sup>-</sup> ) | vs(COO <sup>-</sup> ) | $\Delta\nu$                                      | vsP-F |
|--------------------------------------------------|------------------------|-----------------------|--------------------------------------------------|-------|
|                                                  |                        |                       | (vas(COO <sup>-</sup> ) - vs(COO <sup>-</sup> )) |       |
| [RuCl <sub>2</sub> (dppb)(bipy)]                 | -                      | -                     | -                                                | -     |
| [Ru(L <sub>1</sub> )(dppb)(bipy)]PF <sub>6</sub> | 1705                   | 1257                  | 448                                              | 847   |
| L <sub>1</sub>                                   | 1690                   | 1318                  | 372                                              | -     |
| [Ru(L <sub>2</sub> )(dppb)(bipy)]PF <sub>6</sub> | 1632                   | 1290                  | 342                                              | 832   |
| L <sub>2</sub>                                   | 1684                   | 1322                  | 362                                              | -     |
| [Ru(L <sub>3</sub> )(dppb)(bipy)]PF <sub>6</sub> | 1674                   | 1249                  | 425                                              | 839   |
| L <sub>3</sub>                                   | 1682                   | 1310                  | 372                                              | -     |

**Table 3S.** Electrochemical potentials of the complexes

| Compound                                         | Ru(II)/Ru(III) (V) | Ru(III)/Ru(II) (V) | E <sub>1/2</sub> (V) |
|--------------------------------------------------|--------------------|--------------------|----------------------|
| [RuCl <sub>2</sub> (dppb)(bipy)]                 | 0.62               | 0.57               | 0.6                  |
| [Ru(L <sub>1</sub> )(dppb)(bipy)]PF <sub>6</sub> | 1.45               | 1.40               | 1.4                  |
| [Ru(L <sub>2</sub> )(dppb)(bipy)]PF <sub>6</sub> | 1.35               | 1.29               | 1.3                  |
| [Ru(L <sub>3</sub> )(dppb)(bipy)]PF <sub>6</sub> | 1.34               | 1.28               | 1.3                  |



**Table 4S.** Selectivity indexes (SIs) determined using CCD-1059Sk (fibroblast derived from human normal skin) as reference of non-tumor cell line.

| Cell line  | CINAM       | TRANSCINAM  | COLOROCINAM |
|------------|-------------|-------------|-------------|
| HT-144     | 2.46        | 2.97        | 1.79        |
| SK-MEL-147 | 1.64        | 1.50        | 0.76        |
| CHL-1      | <b>4.63</b> | <b>3.30</b> | 2.37        |
| WM1366     | 0.91        | 1.34        | 1.22        |

**Table 5S.** Selectivity indexes (SIs) determined using FB1 (fibroblast derived from primary culture established from gingival tissue) as reference of non-tumor cell line.

| Cell line  | CINAM | TRANSCINAM  | COLOROCINAM |
|------------|-------|-------------|-------------|
| HT-144     | 1.40  | <b>4.26</b> | 1.42        |
| SK-MEL-147 | 0.94  | 2.14        | 0.60        |
| CHL-1      | 2.64  | <b>4.70</b> | 1.88        |
| WM1366     | 0.52  | 1.91        | 0.97        |

**Table 6S.** Selectivity indexes (SIs) determined using NGM as reference of non-tumor cell line.

| <b>Cell line</b>  | <b>CINAM</b> | <b>TRANSCINAM</b> |
|-------------------|--------------|-------------------|
| <b>HT-144</b>     | 2.82         | 2.32              |
| <b>SK-MEL-147</b> | 1.88         | 1.16              |
| <b>CHL-1</b>      | <b>5.31</b>  | <b>2.5</b>        |
| <b>WM1366</b>     | 1.04         | 1.04              |
